# Supplementary material for: Downregulation of miR-320a/383-sponge-like long non-coding RNA NLC1-C (narcolepsy candidate-region 1 genes) is associated with male infertility and promotes testicular embryonal carcinoma cell proliferation
Source: PubMed Central journal article supplement (PMC4670917; doi:10.1038/cddis.2015.267), 2015-11-05
Supplement: cddis2015267x1.pdf [file cddis2015267x1.pdf]

**Supplementary information:**

Downregulation of miR-320a/383-sponge-like long non-coding RNA NLC1-C (narcolepsy candidate-region 1 genes) is associated with male infertility and promotes testicular embryonal carcinoma cell proliferation

**Mingrong Lü <sup>a,b</sup> , Hui Tian <sup>a,e</sup>, Yun-xia Cao<sup>b</sup>, Xiaojin He<sup>b</sup>, Lingling Chen<sup>c</sup>, Xiaoyuan Song <sup>e</sup>, Ping Ping <sup>d</sup>, Hefeng Huang <sup>a,c</sup> \*and Fei Sun <sup>a,c</sup> \***

Supplementary Figure S1

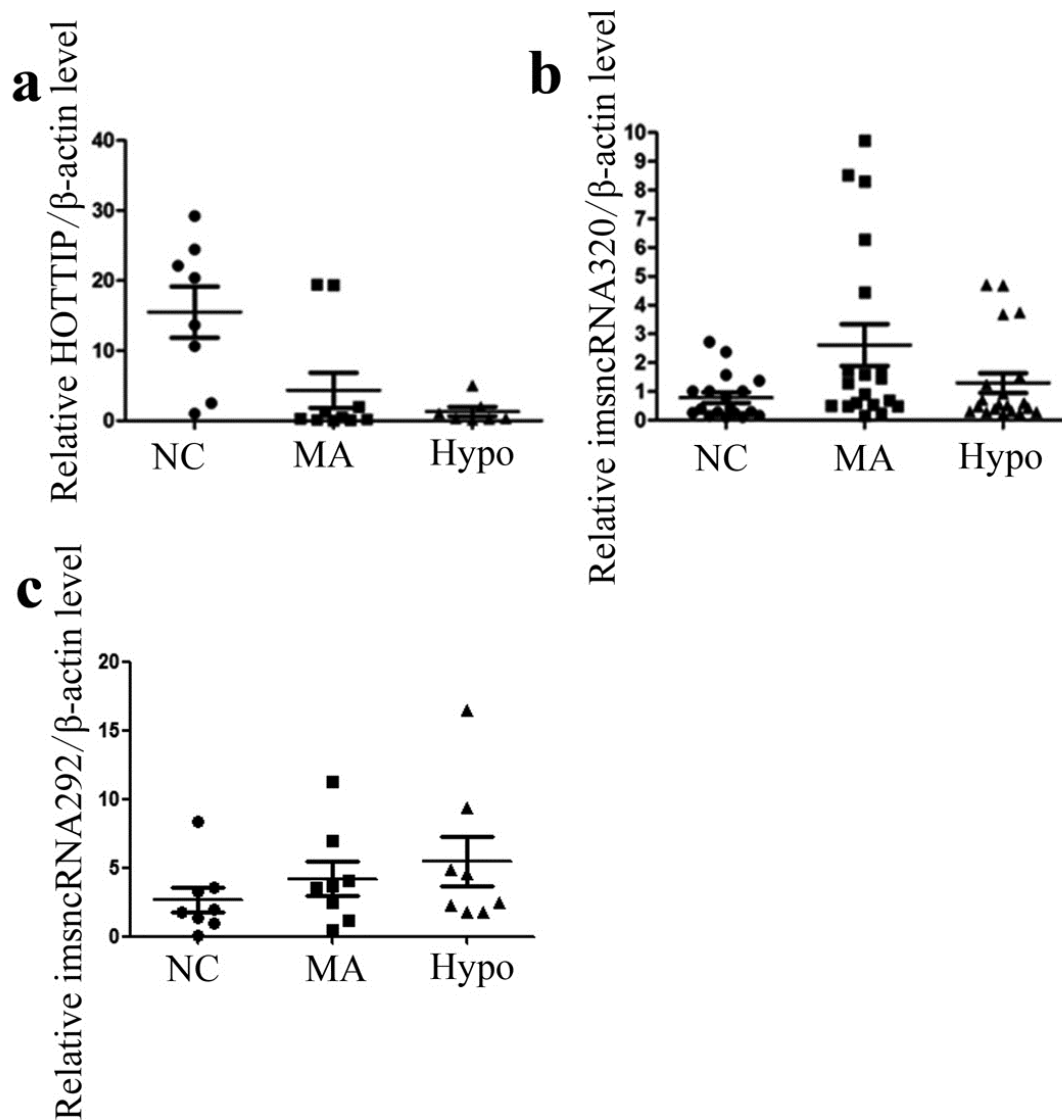

**Figure S1.** Confirmation of microarray data by quantitative real-time PCR. Quantitative real-time PCR analysis confirmed microarray data: lncRNA HOTTIP was down-regulated and imsnRNA320 and imsnRNA292 was up-regulated in NOA (including MA and Hypo ) patients. NOA : non-obstructive azoospermia; MA: maturation arrest; Hypo: Hypospermatogenesis. Error bars indicate the SEM.

Supplementary Figure S2

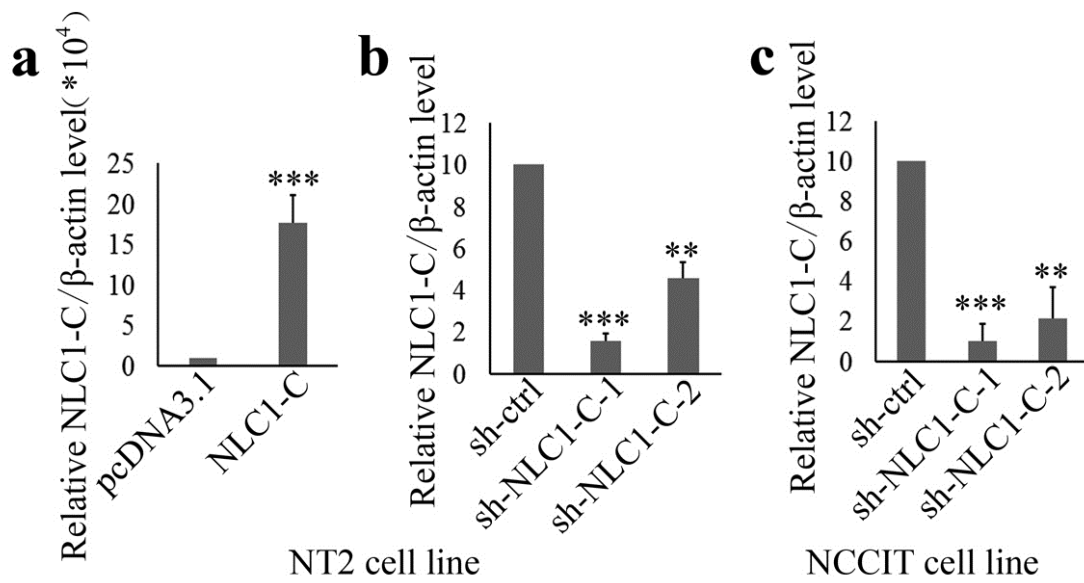

**Figure S2.** Real-time PCR analysis of NLC1-C expression in NT2 and NCCIT cells. a.

Real-time PCR analysis of NLC1-C expression in NT2 cells when transfected with pcDNA3.1 or pcDNA3.1-NLC1-C (NLC1-C) for 48h. b and c. Real-time PCR analysis of NLC1-C expression in NT2 (b) and NCCIT (c) cells when infected with control shRNA or NLC1-C-1/2 shRNA lentiviral particles culture for 48h.

Supplementary Figure S3

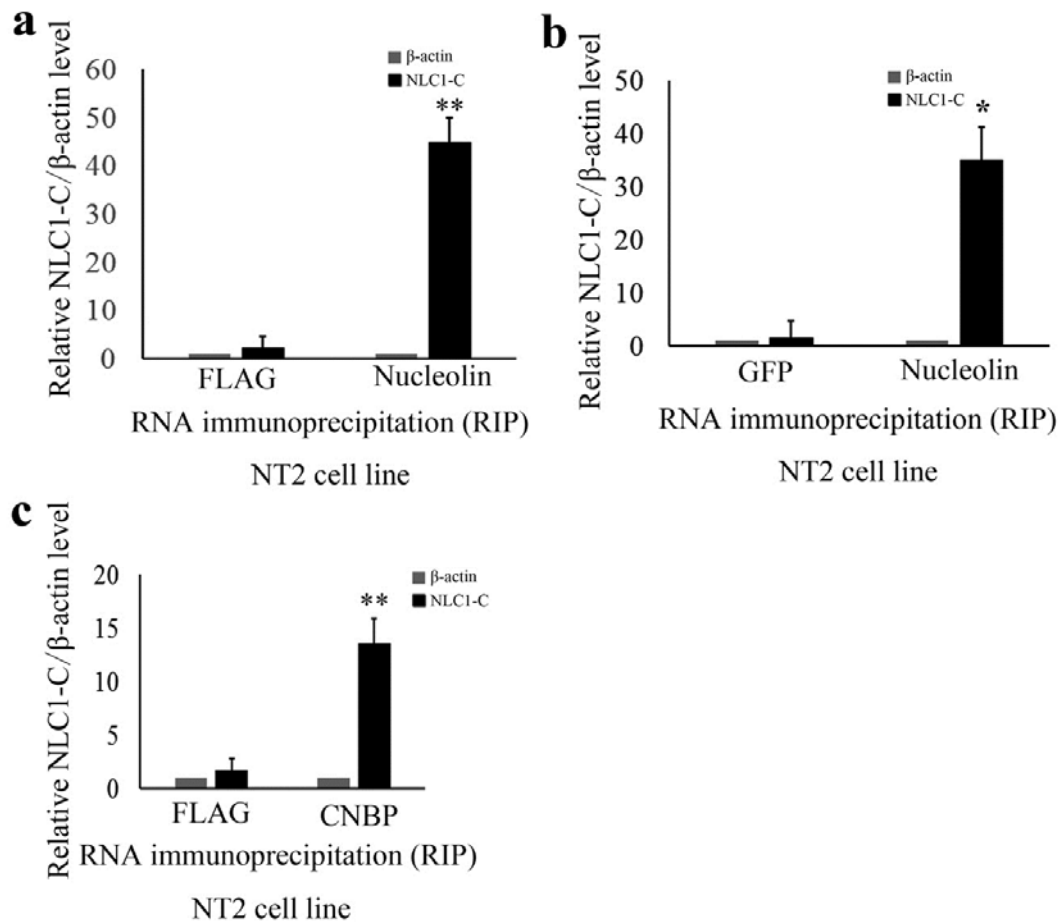

**Figure S3.** Nucleolin IP and CNBP IP specifically retrieves NLC1-C RNA in vitro.

a, b and c. The indicated plasmids were transfected into NT2 cells for 48 h. Lysates were prepared from these cells. RNAs that were co-precipitated with FLAG, GFP were detected by qRT-PCR using primers for NLC1-C and  $\beta$ -actin (as negative control). IP enrichment was determined as the amount of RNA associated to the various proteins. Data are from one of three independent experiments and are represented as mean $\pm$ s.d. with n=3. Data (mean $\pm$ s.d, n = 3 replicates) is relative to mock-IP (FLAG or GFP)

Supplementary Figure S4

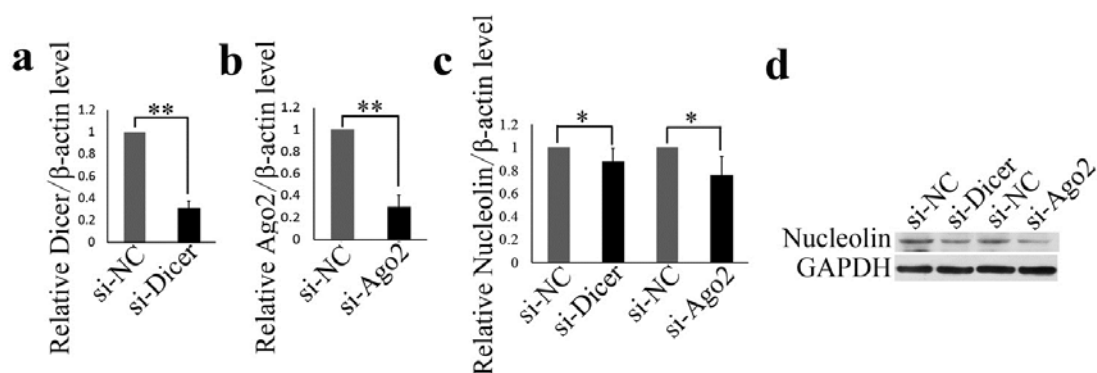

**Figure S4.** Knockdown of Dicer and Ago2 decreased Nucleolin expression. a, b ,c and d. NT2 cells were transfected with control siRNA (si-NC) or Dicer or Ago2 siRNAs separately. The expression of Dicer(a), Ago2(b), Nucleolin(c and d) were detected by quantitative real-time PCR and western blot after transfection for 48 h. GAPDH was used as internal reference. Data are represented as mean±s.d. from three independent experiments. \*P<0.05 or \*\*P<0.01 compared with control RNA.

Supplementary Figure S5

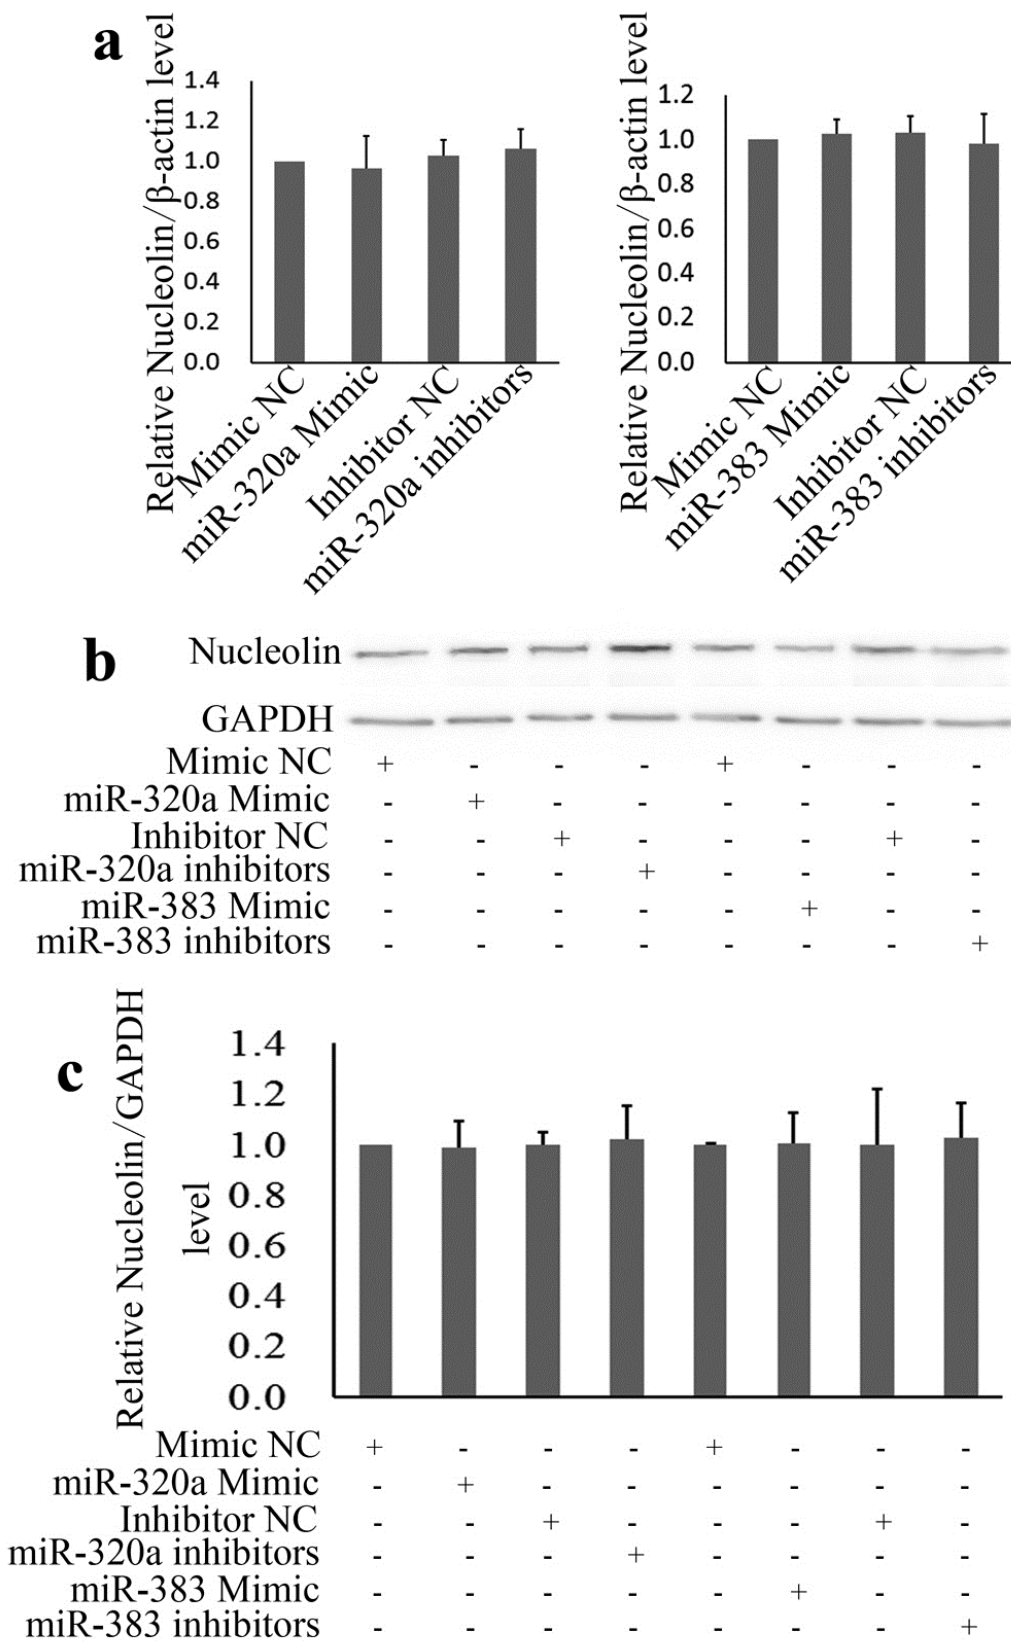

**Figure S5.** Nucleolin was not the target of miR-320a and miR-383. a and b. Quantitative

real-time PCR(a) and western blot(b)analysis of Nucleolin expression after NT2 cells were transfected with indicated miRNAs for 48 h and the corresponding densitometric analysis (c).

Data are represented as mean $\pm$ s.d. from three independent experiments.

**Supplementary Table S1.** List of primer pairs for construction of vectors.

| Name of gene                                   | Sequence (5' to 3')                                                                                         | Annealing temperature (°C) |
|------------------------------------------------|-------------------------------------------------------------------------------------------------------------|----------------------------|
| <b>NLC1-C-pcDNA3.1</b>                         | Forward:ATTAGGATCCTGAAGTGCTGACGGGTGGAGCGA<br>Reward:CGCTGCGGCCGCTTCCCACTGACTTGTATATTT                       | 58                         |
| <b>NLC1-C (ISH, sense)</b>                     | Forward:ACTGAAGCTTCTCTATGACCTCATCCATGGGAAA<br>Reward:AGCTGAATTCTCCCACTGACTTGTATATTTTCA                      | 65                         |
| <b>NLC1-C (ISH, antisense)</b>                 | Forward:ACTGAAGCTTTGGAGCCTCATTCACTGTGAAGT<br>Reward:AGCTGAATTCTCTATGACCTCATCCATGGGAAA                       | 64                         |
| <b>NLC1-C (Pulldown)</b>                       | Forward:ACTAAAGCTTTGAAGTGCTGACGGGTGGAGCGA<br>Reward:ACGAATCTTTCCCACTGACTTGTATATTTTCA                        | 60                         |
| <b>NLC1-C (miR-320a binding site mutation)</b> | Forward:ATGGAAGAGTGCTAACTATAGGTGGGGAGCACATGTGGTGAAGAT<br>Reward:TAGTTAGACTCTTCCATCTGTGGGGTCTGCCCTACT        | 65                         |
| <b>NLC1-C (miR-383 binding site mutation)</b>  | Forward:TTGACATACGAGAGACTAGATCAGTCACTTCACAGTGAATGAGGCT<br>Reward:ATCTAGTCTCTCGTATGTCAACCTGCTCCTTCAGGTCCCTCT | 64                         |
| <b>NLC1-C-pZW1-snovector</b>                   | Forward: ATTGGAATTCTGAAGTGCTGACGGGTGGAG<br>Reward: ACGGGGTACCTTCCCACTGACTTGTATAT                            | 62                         |
| <b>Nucleolin-FLAG</b>                          | Forward:AGCTGAATTCATGGTGAAGCTCGCGAAGGCAGGTAATAAAA<br>Reward: TGCAGTCGACCTATTCAAACCTTCGTCTTCTTTCTTGT         | 58                         |

**Supplementary Table S2.** List of primer pairs for real-time PCR and PCR.

| Name of gene            | Forward primer sequence (5' to 3')     | Reverse primer sequence (5' to 3')     |
|-------------------------|----------------------------------------|----------------------------------------|
| <b>β-actin(human)</b>   | TGGCACCCAGCACAATGAA                    | CTAAGTCATAGCCGCTAGAA                   |
| <b>NLC1-C</b>           | TGCTTGACTTTCAAGAGGTAA                  | GCTCTCAGTCAGCAGACTT                    |
| <b>Nucleolin</b>        | CGTTCGGGCAAGGATAGTTAC                  | GGCATCCTCCTCACTGTTGAAG                 |
| <b>Ims320</b>           | ATTTGAGGTATAAAAATTATAACTAT             | TTATAAGTCATTCTGTCACCTTCTG              |
| <b>HOTTIP</b>           | CCTAAAGCCACGCTTCTTTG                   | TGCAGGCTGGAGATCCTACT                   |
| <b>pri-miR-383</b>      | CTTTCCAAGAGTTTCACT                     | CCACTCCAGTCCACCAAAT                    |
| <b>pri-miR-320a</b>     | TGGGCCACAGTATTTATCAGGCGGCGCTT          | AGCGCCGAGCATAGCGTAGCCAGACCA            |
| <b>miR-320 promoter</b> | CACAGAGCCTCGAATGCCATACCTAGGATT<br>CATC | ACCTCATCCTTTTTCGCCCTCTCAACCCAGC<br>TTT |
| <b>SGCZ promoter</b>    | AAACTATAAAGAAGTAGGGGGAGAGACAG<br>CTGTC | CAGTGGGAAAAGAAGATAATCAAGTCAGA<br>AGGG  |



**Supplementary Table S3.** Sequence of oligonucleotides.

| Oligonucleotides                   | Sequence (5' to 3')                              |
|------------------------------------|--------------------------------------------------|
| <b>Inhibitor NC</b>                | CAGUACUUUUGUGUAGUACAA                            |
| <b>has-miR-320a inhibitors</b>     | UCGCCCUCUCAACCCAGCUUUU                           |
| <b>has-miR-383 inhibitors</b>      | AGCCACAAUCACCUUCUGAUCU                           |
| <b>Mimics NC</b>                   | UUCUCCGAACGUGUCACGUTT<br>ACGUGACACGUUCGGAGAATT   |
| <b>hsa-miR-320a mimics</b>         | AAAAGCUGGGUUGAGAGGGCGA<br>GCCUCUCAACCCAGCUUUUUU  |
| <b>hsa-miR-383 mimics</b>          | AGAUCAGAAGGUGAUUGUGGCU<br>CCACAAUCACCUUCUGAUCUUU |
| <b>LNA miR-320</b>                 | TCGCCCTCTCAACCCAGCTTTT                           |
| <b>LNA miR-383</b>                 | AGCCACAATCACCTTCTGATCT                           |
| <b>NLC1-C-PLKO.1-1</b>             | GCTGGCTCACCTGGCACTGCA                            |
| <b>NLC1-C-PLKO.1-2</b>             | GACCGTCCCTGGCCGCAAGTG                            |
| <b>NLC1-C (RNA-FISH)-sense</b>     | UCAAGAGGUAUUUCCGAGCUCUGCUCUGAGGCCU               |
| <b>NLC1-C (RNA-FISH)-antisense</b> | AGGCCUCAGAGCAGAGCUCGGAAUUUACCUUUGA               |

**Supplementary Table S4.** List of primary antibodies and secondary antibodies.

| Antigen                                          | WB dilutions | Antibody name                                    | Catalog number | Company                      |
|--------------------------------------------------|--------------|--------------------------------------------------|----------------|------------------------------|
| GAPDH                                            | 1:1000       | GAPDH (14C10)<br>Rabbit mAb                      | #2118          | cell signaling<br>technology |
| Nucleolin                                        | 1:1000       | Rb-pAb to Nucleolin                              | ab70493        | abcam                        |
| c-Myc                                            | 1:200        | c-Myc Rabbit Ab                                  | #9402          | cell signaling<br>technology |
| Rabbit IgG secondary<br>antibody                 | 1:6000       | Rabbit IgG secondary<br>antibody - H&L           | ab6802         | abcam                        |
| Mouse IgG secondary<br>antibody                  | 1:6000       | Mouse IgG secondary<br>antibody - H&L            | ab6819         | Abcam                        |
| PARP                                             | 1:200        | PARP (46D11) Rabbit<br>mAb                       | #9532S         | cell signaling<br>technology |
| Caspase-3                                        | 1:6000       | Caspase-3 (8G10) Rabbit<br>mAb                   | #9665S         | cell signaling<br>technology |
| Caspase-8                                        | 1:6000       | Caspase-8 (D35G2) Rabbit<br>mAb                  | #4790S         | cell signaling<br>technology |
| Caspase-9                                        | 1:6000       | Cleaved Caspase-9 (Asp330)<br>(D2D4) Rabbit mAb  | #7237S         | cell signaling<br>technology |
| Anti-Digaoxigenin<br>-Fluorescein, Fab fragments | 1:250        | Anti-Digaoxigenin<br>-Fluorescein, Fab fragments | 11207741910    | Roche                        |
